# Supplementary material
Source: publisher figshare collection journal article supplement (https://acs.figshare.com/ndownloader/files/4062766)
Supplement: Supplementary file 1 [file 4062766]

## Supplementary information to the paper

### Hydroxylation of Metal Supported Sheet-like Silica Films

by

B. Yang, E. Emmez, W. E. Kaden, X. Yu, J. A. Boscoboinik, M. Sterrer, S. Shaikhutdinov,\*  
H.-J. Freund

#### I. OD-OH exchange with water:

Figure S1 shows an IRA spectrum from a silica film that was initially hydroxylated with H<sub>2</sub>O to form OH containing silanols, and then dosed with D<sub>2</sub>O at 100 K and heated to 300 K to desorb the molecular water. Using the OH containing film as a reference, we can assign the positive signal at  $\sim 3750\text{ cm}^{-1}$  to the disappearance of OH groups, and the negative signal at  $\sim 2765\text{ cm}^{-1}$  to the formation of OD species via H-D exchange with the D<sub>2</sub>O.

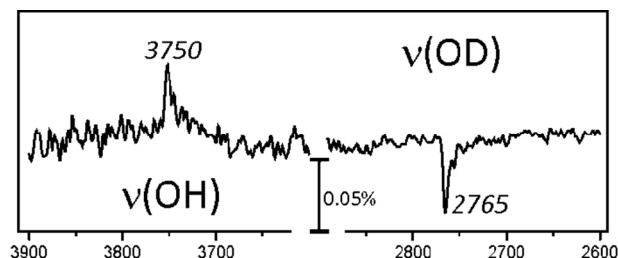

Figure S1. IRA-spectrum of an OH-containing silica film after exposure to D<sub>2</sub>O at 100 K and heating to 300 K. The positive  $\nu(\text{OH})$  signal at  $3750\text{ cm}^{-1}$  indicates disappearance of OH species, while formation of OD species is seen as the negative signal at  $2765\text{ cm}^{-1}$ .

#### II. Quantitative analysis of the $m/z^+$ distributions in Fig. 7 of the main text:

In figure S2, we attempt to make use of the  $m/z^+$  distribution within the low temperature desorption feature from Fig. 7 to estimate H-D exchange probabilities due to wall reactions within our mass spectrometer, which is presumed to be deuterated due many D<sub>2</sub>O experiments conducted within the chamber prior to ammonia adsorption. Provided there is no water contamination, the feature desorbing at  $\sim 115\text{ K}$  in figure 7 is presumed to be clean ammonia, which is what we dosed. Based on the desorption temperature, which is  $\sim 40\text{ K}$  below that for molecular water, this seems like a fair presumption. In this case, *all* of the signal collected at  $m/z^+ = 19$  and  $20$  must come from collection of NHD<sub>2</sub> and ND<sub>3</sub>, respectively. As such, we can assume that the relative intensity of these channels comes *exclusively* from creation of these parent ions. Therefore, we have plotted bars equal to the relative intensities of  $m/z^+ = 19$  and  $20$  that were experimentally collected, and attribute them to ND<sub>2</sub>H (dark

grey) and ND<sub>3</sub> (black), respectively. While assignment of these masses was straightforward, the remainder of the channels contains some combination of contributions from the cracking of larger species and transmission of parent ions at those masses.

To account for the cracking contributions, we have used the cracking pattern provided by NIST for NH<sub>3</sub>,<sup>1</sup> and make the approximation that all possible configurations of NR<sub>3</sub> will show the same NR<sub>3</sub>:NR<sub>2</sub>:NR:N = 1:0.8:0.074:0.023 relative intensities, where R may be any combination of H's and D's, and loss of a D is considered equally as likely as loss of an H. From this, we can conclude that cracking of

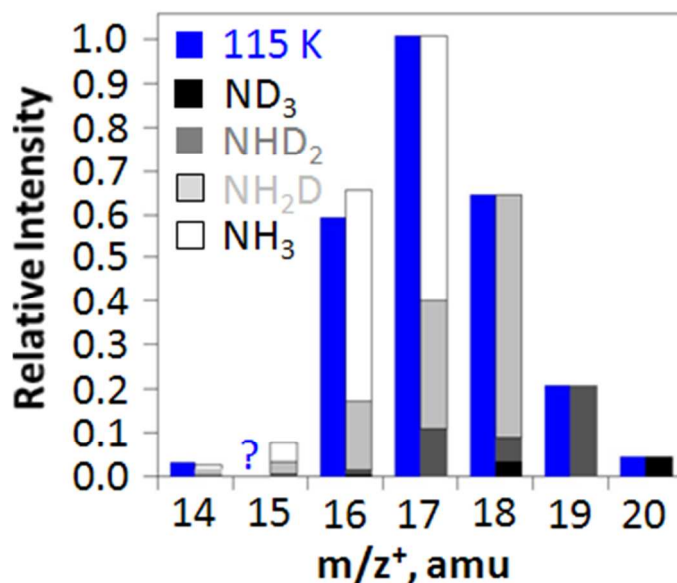

Figure S2. The relative intensities of the various masses detected during desorption of the low temperature feature in figure 7 of the main text are plotted in blue along with a breakdown of the various NR<sub>3</sub> molecules presumed to contribute to the overall intensity of each channel. In this case, R is used to denote either H or D, and cracking contributions have been estimating using NH<sub>3</sub> reference data from NIST.<sup>1</sup>

the ND<sub>3</sub> parent ion will result in contributions to the m/z<sup>+</sup> = 18, 16, and 14 signals, such that 80% of the primary signal will contribute to ND<sub>2</sub><sup>+</sup> (18), 7.4% to ND<sup>+</sup> (16), and 2.3% to N<sup>+</sup> (14). To denote the source of origin, these contributions have been included as black bars at the appropriate masses. For NHD<sub>2</sub>, however, we have to consider that loss of an R might mean an H or a D. Since, we have 1H and 2 D's, loss of an H (18) is half as likely as loss of a D (17). By the same token, loss of an H and a D (16) is twice as likely as the loss of 2 D's (15). By this logic, we conclude that cracking of the NHD<sub>2</sub><sup>+</sup> parent ion (dark grey) leads to contributions at m/z<sup>+</sup> = 14, 15, 16, 17, and 18 equivalent to 2.3%, 2.5%, 4.9%, 53.3%, and 26.7% of the primary signal, respectively. After accounting for cracking from ND<sub>3</sub> and NHD<sub>2</sub>, the remainder of the m/z<sup>+</sup> = 18 signal must come from the collection of NDH<sub>2</sub> species (light grey). After again applying the cracking procedure to this species, we can finally attribute the unaccounted m/z<sup>+</sup> = 17 signal to collection of NH<sub>3</sub> species (white).

Given the degree to which our cracking contributions approximate the relative intensities of masses 14 and 16, and presumably 15, we can conclude that our NIST-based cracking assumptions are not terribly unreasonable. Furthermore, if we assume that the species leaving the sample in this desorption feature was contaminant-free  $\text{NH}_3$  prior to entry into the mass-spectrometer, then we can estimate the likelihood of exchanging 1, 2, or all 3 of the hydrogens for deuterium within the MS. Given the presumed cleanliness of the ammonia dose, and the low desorption temperature of this feature, molecular desorption of unreacted  $\text{NH}_3$  would not be unreasonable.

If we start by first considering mass 20, which must still reflect ND<sub>3</sub> species, we now have two possible routes of formation. All three of the R's can be replaced (black), or the two H's can be selectively exchanged (dark grey), which will be half as likely as exchange of an H and a D to form NHD<sub>2</sub> (19). By the same logic, exchange of 1 R group (light grey) will be twice as likely to form NHD<sub>2</sub> (19) as NDH<sub>2</sub> (18). If we complete the plot by including the fractional abundance of NDH<sub>2</sub> expected to survive without exchanging (white) and all cracking contributions (diagonal lines), then we note a distribution of fractional abundances that closely resembles the distribution observed for the 150 K desorption feature in Figure 7. Based on the quality of this fit, we conclude that the majority of the molecules desorbing at 150 K are in fact NDH<sub>2</sub>, which have undergone 1 H-D exchange with OD silanol groups at the silica interface.

Figure S3. The fractional intensities of the various masses detected during desorption of the high temperature feature in figure 7 of the main text are plotted in red along with a distribution predicted using the procedures described in the text for the desorption of pure NDH<sub>2</sub>.

**Reference:**

1. NIST Standard Reference Database Number 69, ©2011

<http://webbook.nist.gov/cgi/cbook.cgi?ID=C7664417&Units=SI&Mask=200#Mass-Spec>.
